# Supplementary material
Source: PubMed Central journal article supplement (PMC2397317)

**Supplementary Figure 1 Specificity of the anti NS2 antiserum for immunofluorescence.** A9 cells transfected or untransfected with pdBMVp for 48h were stained with  $\alpha$ -NS2 and  $\alpha$ -capsid antibodies. While some background staining is observed in non-transfected cells, specific NS2 signal is detected in nucleus, cytoplasm and nuclear periphery.

**Supplementary Figure 2 Significant nuclear accumulation of NF $\kappa$ B only occurs at relatively high NS2 expression levels.** (A) L929 cells were transfected with GFP-NS2 and stained for NF $\kappa$ B. Nucleocytoplasmic distribution of NF $\kappa$ B is plotted as a function of total GFP fluorescence (background corrected and normalized to maximum). Solid green line represents mean of untransfected cells. Dashed lines represent 2 standard deviations plus or minus this mean. (B) Examples of cells with various levels of total GFP fluorescence.

**Supplementary Figure 3 Colocalization of capsid and N-terminally exposed VP2 (2Nt) in SAABs.** A9 cells transfected with pdBMVp (WT) for 48h. Cells were fixed before permeabilization (- pre-extraction) or permeabilized and subsequently fixed (+ pre-extraction). Colocalization of total capsid (Capsid) and DNA-filled capsid (2Nt) either without pre-extraction (top) or with pre-extraction (bottom).

Engelsma et al.,  
Supplementary Figure 1

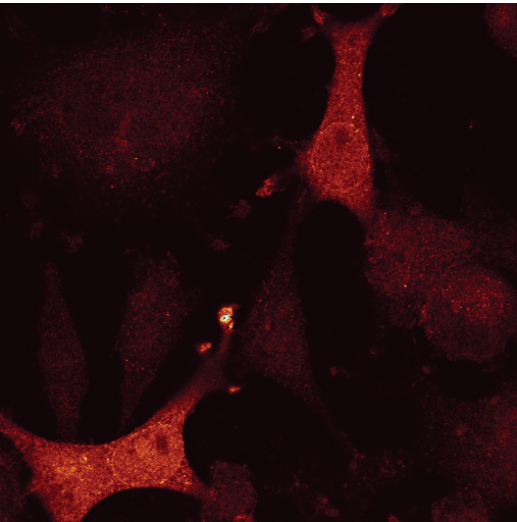

$\alpha$ -NS2

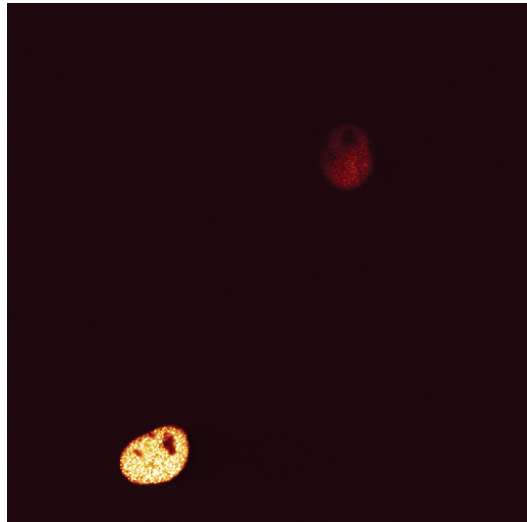

$\alpha$ -capsid

Engelsma et al.,  
Supplementary Figure 2

A

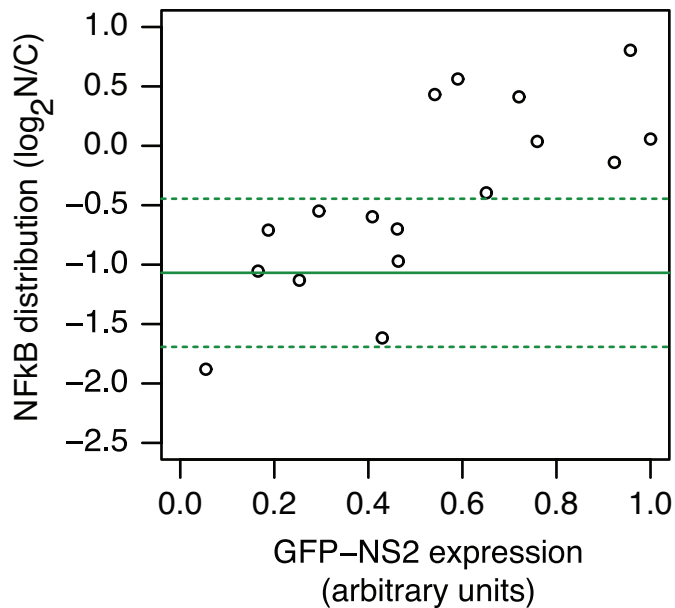

B

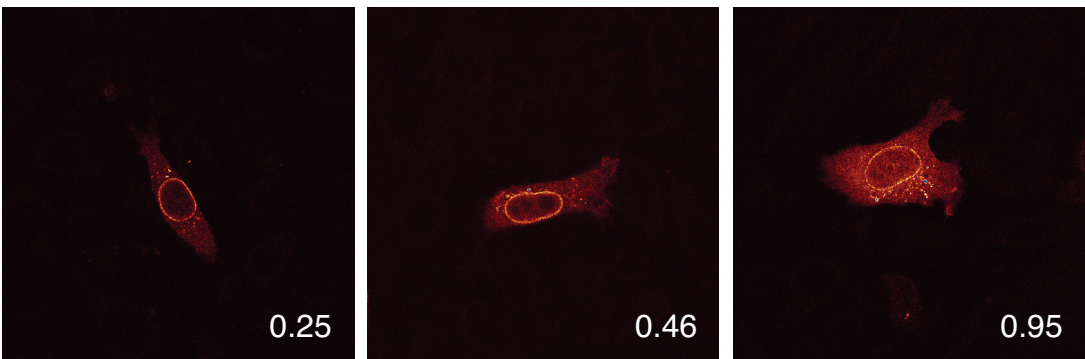

Engelsma et al.,  
Supplementary Figure 3

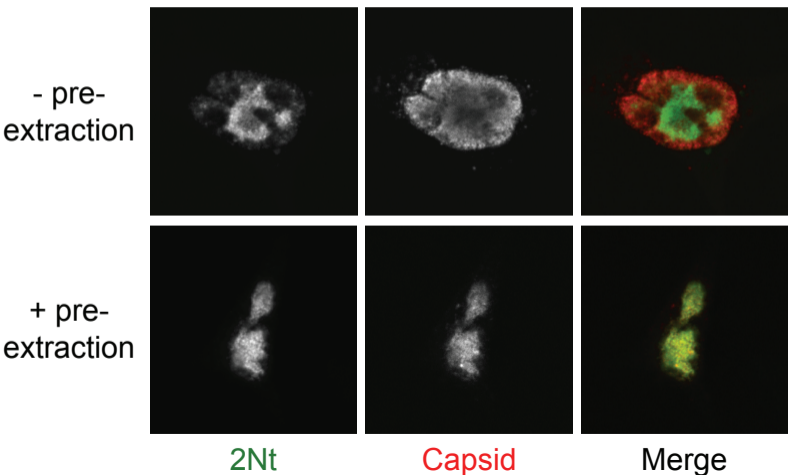

Supplement: E08-01-0009_1.pdf [file E08-01-0009_1.pdf]
